# Supplementary material for: Evaluation of safety and efficacy of intracranial self-expanding drug-eluting stents for symptomatic intracranial atherosclerotic stenosis: a prospective, multicentre, randomised controlled, superiority clinical trial protocol
Source: HighWire-hosted journal article supplement (doi:10.1136/bmjopen-2024-091152), 2024-11-01
Supplement: bmjopen-2024-091152supp001_data_supplement.pdf [file bmjopen-2024-091152supp001_data_supplement.pdf]

ICF version No.: V1.0

version date: 2023-08-21

1

Informed Consent Form (ICF)

|                                                |                                                                                                                                                                                                                                                                                                                                                                                                                                                                                                                                                                                                                                                                                                                                                                                    |
|------------------------------------------------|------------------------------------------------------------------------------------------------------------------------------------------------------------------------------------------------------------------------------------------------------------------------------------------------------------------------------------------------------------------------------------------------------------------------------------------------------------------------------------------------------------------------------------------------------------------------------------------------------------------------------------------------------------------------------------------------------------------------------------------------------------------------------------|
| Name of investigational medical device:        | Intracranial drug-eluting stents                                                                                                                                                                                                                                                                                                                                                                                                                                                                                                                                                                                                                                                                                                                                                   |
| Specification/Model of investigational device: | HC*IDES-2013N-00, HC*IDES-2017N-00, HC*IDES-2020N-00, HC*IDES-3020N-00, HC*IDES-3025N-00, HC*IDES-3025M-00, HC*IDES-3030N-00, HC*IDES-3030M-00, HC*IDES-4020N-00, HC*IDES-4025N-00, HC*IDES-4025M-00, HC*IDES-4030N-00, HC*IDES-4030M-00, HC*IDES-4040N-00, HC*IDES-4040M-00, HC*IDES-5025N-00, HC*IDES-5025M-00, HC*IDES-5030N-00, HC*IDES-5030M-00, HC*IDES-5040N-00, HC*IDES-5040M-00, HC*IDES-2013N-12, HC*IDES-2017N-12, HC*IDES-2020N-12, HC*IDES-3020N-12, HC*IDES-3025N-12, HC*IDES-3025M-12, HC*IDES-3030N-12, HC*IDES-3030M-12, HC*IDES-4020N-12, HC*IDES-4025N-12, HC*IDES-4025M-12, HC*IDES-4030N-12, HC*IDES-4030M-12, HC*IDES-4040N-12, HC*IDES-4040M-12, HC*IDES-5025N-12, HC*IDES-5025M-12, HC*IDES-5030N-12, HC*IDES-5030M-12, HC*IDES-5040N-12, HC*IDES-5040M-12 |
| Sponsor:                                       | Shanghai HeartCare Medical Technology Co., Ltd                                                                                                                                                                                                                                                                                                                                                                                                                                                                                                                                                                                                                                                                                                                                     |
| Agent:                                         | Shanghai HeartCare Medical Technology Co., Ltd                                                                                                                                                                                                                                                                                                                                                                                                                                                                                                                                                                                                                                                                                                                                     |
| Name of clinical trial protocol:               | Evaluation of safety and efficacy of intracranial drug-eluting stents for symptomatic intracranial atherosclerotic stenosis: a prospective, multicenter, randomized controlled, superiority clinical trial                                                                                                                                                                                                                                                                                                                                                                                                                                                                                                                                                                         |
| Clinical trial protocol No.:                   | SHXW-202301                                                                                                                                                                                                                                                                                                                                                                                                                                                                                                                                                                                                                                                                                                                                                                        |
| ICF version No.:                               | V1.0                                                                                                                                                                                                                                                                                                                                                                                                                                                                                                                                                                                                                                                                                                                                                                               |
| ICF version date:                              | 2023-08-21                                                                                                                                                                                                                                                                                                                                                                                                                                                                                                                                                                                                                                                                                                                                                                         |

ICF version No.: V1.0

version date: 2023-08-21

Clinical trial institution: Henan Provincial People's Hospital

Principal investigator: Li Tianxiao

ICF version No.: V1.0

version date: 2023-08-21

### 3 Distinguished sir/madam,

4 You are invited to participate in a clinical trial involving medical devices. The  
5 following describes the background, objectives, methods, potential benefits, risks or  
6 inconveniences, and your rights related to this trial. Please read this informed consent  
7 carefully before deciding to participate.

8 This informed consent provides information to help you decide whether to join  
9 this clinical trial. The lead institution for this trial is Henan Provincial People's  
10 Hospital, where the research is conducted under the supervision of Director Li  
11 Tianxiao from the Department of Cerebrovascular Diseases. If you have any questions,  
12 please ask the research physician responsible for this trial to ensure you fully  
13 understand the details. Your participation in this trial is based on voluntary principle.  
14 Please sign the statement in the informed consent form after reading the following  
15 data, if you participate in the clinical study of your own accord.

## 16 1. Study name, Objectives, and Background

### 17 1.1. Study name

18 Evaluation of safety and efficacy of intracranial drug-eluting stents for  
19 symptomatic intracranial atherosclerotic stenosis: a prospective, multicenter,  
20 randomized controlled, superiority clinical trial.

### 21 1.2. Objectives

22 To validate the safety and efficacy of intracranial drug-eluting stents  
23 manufactured by Shanghai HeartCare Medical Technology Co., Ltd in the treatment  
24 of symptomatic intracranial atherosclerotic stenosis.

### 25 1.3. Background

26 Intracranial atherosclerotic stenosis (ICAS) is a significant cause of ischemic  
27 stroke occurrence and recurrence worldwide. In North America, ICAS accounts for 8%  
28 to 10% of stroke etiologies, while in Asia, it constitutes 30% to 50%. In China, ICAS  
29 prevalence among stroke/transient ischemic attack (TIA) patients is as high as 46.6%.

ICF version No.: V1.0

version date: 2023-08-21

30 Treatment options for intracranial atherosclerotic stenosis (ICAS) encompass  
31 medical therapy, surgical interventions, and endovascular procedures. Globally,  
32 surgical treatments, due to their higher complication rates, have not received  
33 widespread endorsement in guidelines. In contrast, medical and endovascular  
34 therapies continue to be investigated to establish the optimal approach for managing  
35 ICAS. Current evidence strongly supports medical therapy as the first-line treatment  
36 for ICAS. Notably, results from two pivotal randomized controlled trials (RCTs)—the  
37 Stenting and Aggressive Medical Management for Preventing Recurrent Stroke in  
38 Intracranial Stenosis (SAMMPRIS) trial in 2011 and the Vitesse Intracranial Stent  
39 Study for Ischemic Stroke Therapy (VISSIT) trial in 2015—have consistently shown  
40 that aggressive medical therapy is both more effective and safer than endovascular  
41 interventions. Furthermore, a comprehensive review in 2018 comparing stent  
42 placement with aggressive medical therapy for symptomatic ICAS (sICAS)  
43 reaffirmed that medical therapy remains the preferred initial treatment option over  
44 endovascular procedures for managing sICAS.

45 The evolution of endovascular treatments for intracranial atherosclerotic stenosis  
46 (ICAS) reflects ongoing efforts to explore safer and more effective approaches,  
47 despite varying outcomes from pivotal studies such as SAMMPRIS, VISSIT, and the  
48 Chinese Angioplasty and Stenting for Symptomatic Intracranial Severe Stenosis  
49 (CASSISS) trial, which did not establish the superiority of endovascular interventions  
50 over medical therapy alone. In real-world settings, due to persistent high risks of  
51 stroke recurrence under medical therapy, research continues to advance endovascular  
52 treatment methods, including material developments. Following SAMMPRIS, studies  
53 like the Wingspan Stent System Post-Market Surveillance (WEAVE) and multicenter  
54 registry data from China emphasize rigorous patient selection and refined procedural  
55 standards, highlighting improved safety and promising efficacy in treating sICAS at  
56 established neurointerventional centers. Insights from CASSISS underscore the  
57 ongoing focus on disease diagnosis, technological innovations, and advancements in  
58 interventional devices for future sICAS research.

59 Drug-eluting stents (DES) typically consist of a base layer and a drug-eluting

ICF version No.: V1.0

version date: 2023-08-21

60 layer. The drug-eluting layer contains anti-proliferative drugs that are slowly released,  
61 inhibiting the proliferation and migration of vascular smooth muscle cells to prevent  
62 in-stent restenosis (ISR). Commonly used drugs in drug-eluting stents include  
63 paclitaxel and rapamycin. Theoretical considerations suggest that rapamycin-based  
64 drug-eluting stents may offer superior efficacy compared to paclitaxel-based ones.  
65 Paclitaxel, known for its cytotoxic properties, operates within a narrow therapeutic  
66 window, which poses a heightened risk of cytotoxic side effects due to its proximity to  
67 inhibitory and cytotoxic concentrations. In contrast, rapamycin, categorized as a cell  
68 inhibitor, features a broader therapeutic window between inhibitory and cytotoxic  
69 concentrations, thereby potentially enhancing safety relative to paclitaxel. Previous  
70 studies indicate that the use of drug-eluting stents or drug-coated balloons in  
71 endovascular interventions effectively mitigates ISR risk by suppressing neointimal  
72 proliferation. In China, institutions such as Xuanwu Hospital and Shanghai Changhai  
73 Hospital have achieved success rates exceeding 90% in treating intracranial  
74 atherosclerotic disease (ICAD) with drug-eluting stents. The primary intraoperative  
75 complication reported is branch occlusion, managed postoperatively with standard  
76 antiplatelet therapy. Notably, only one case reported ISR and symptomatic recurrence,  
77 with no instances of neurotoxic reactions; however, two cases experienced arterial  
78 aneurysm-like dilation. These findings underscore the technical feasibility of  
79 employing drug-eluting stents for patients with symptomatic ICAD resistant to  
80 rigorous medical treatment, leading to reduced ISR rates from 30% initially to 0-7%  
81 over the short term (6 months to 1 year). Importantly, most patients experiencing  
82 restenosis did not encounter stroke recurrence or drug-related neurotoxicity,  
83 underscoring the safety and efficacy of drug-eluting stents for ICAS treatment.  
84 Research focusing on coronary and carotid arteries suggests that drug-eluting stents  
85 may offer superior clinical and imaging outcomes compared to bare-metal stents for  
86 managing narrowings or ISR.

87 Based on the aforementioned points, drug-eluting stents have been validated for  
88 their safety and effectiveness in treating ICAS. Shanghai HeartCare Medical  
89 Technology Co., Ltd has independently developed an intracranial drug-eluting stent,

ICF version No.: V1.0

version date: 2023-08-21

which has successfully undergone type testing at the National Medical Device Quality Supervision and Inspection Center in Tianjin, accredited by the State Administration of Drug Administration. It has received a favorable inspection report, confirming that the product design is finalized and meets the intended design specifications. Furthermore, the stent has undergone preclinical studies including animal experiments and risk-benefit analyses at Western Point Biotech (Chengdu) Co., Ltd., preliminarily demonstrating the safety and efficacy of this intracranial drug-eluting stent. With these achievements, the product is poised for clinical trials. There are plans in progress to initiate a prospective, multicenter, randomized controlled trial to assess the safety and effectiveness of the intracranial drug-eluting stent in treating symptomatic intracranial atherosclerotic stenosis.

## 2. Methods and Study Design

This study is a prospective, multicenter, randomized controlled superiority clinical trial to be conducted at multiple sites in China. The study aims to recruit 208 patients with symptomatic intracranial atherosclerotic stenosis (ICAS), with our center expecting to enroll 30 participants.

Participants or their guardians will sign an informed consent form (ICF) approved by the Ethics Committee. Eligible participants who meet the inclusion criteria and do not meet any exclusion criteria will be randomized using a central registration system. The intervention group will receive the intracranial drug-eluting stent manufactured by Shanghai HeartCare Medical Technology Co., Ltd., while the control group will be treated with the Wingspan Stent System produced by Stryker (Beijing) Medical Devices Co., Ltd. All participants will be followed up at the following intervals: during the surgery, within 7 days post-surgery or before discharge, at 30 days post-surgery, at 6 months, at 12 months, and at 24 months post-surgery.

The primary outcome measure is the incidence of in-stent restenosis (ISR) at 6 months post-surgery, which will be used to evaluate the safety and efficacy of the intracranial drug-eluting stent.

ICF version No.: V1.0

version date: 2023-08-21

118 The study evaluated seven secondary outcomes: (1) success rate of device  
119 operation, which demonstrated successful stent implantation and coverage of the  
120 target lesion site, along with the successful withdrawal of the delivery system; (2)  
121 operation success rate, including successful stent implantation, absence of major  
122 adverse events during the procedure (such as death or stroke), and immediate  
123 postoperative residual stenosis < 50%; (3) in-stent restenosis rate at 12 months  
124 post-operation; (4) incidence of symptomatic stent restenosis at 6 months and 12  
125 months post-operation; (5) Modified Rankin score (mRS) at 30 days, 6 months, and  
126 12 months post-surgery; (6) National Institutes of Health Stroke Scale score (NIHSS)  
127 preoperatively and 6 months post-hospital discharge; (7) target lesion  
128 revascularization rates at 30 days, 6 months, and 12 months post-operation, defined as  
129 the need for any surgical or percutaneous intervention to restore blood supply to the  
130 target vessel. This study examines four safety indicators related to surgical outcomes:  
131 (1) stroke incidence at 30 days, 6 months, and 12 months post-surgery; (2) all-cause  
132 death rates at 30 days, 6 months, 12 months, and 24 months post-surgery; (3)  
133 incidence rates of device-related adverse events/serious adverse events at 30 days, 6  
134 months, 12 months, and 24 months post-surgery; and (4) incidence rates of device  
135 defects. These measures will be used to verify the safety and efficacy of the  
136 intracranial drug-eluting stent manufactured by Shanghai HeartCare Medical  
137 Technology Co., Ltd., in treating symptomatic intracranial atherosclerotic stenosis.  
138 This study does not involve a central laboratory. All sample collection, utilization, and  
139 processing will be managed by our center.

### 140 3. Study Duration and Procedure

141 Your expected participation in this trial will last approximately 2 years,  
142 encompassing preoperative screening, surgery, and follow-up visits at 7 days  
143 post-surgery or before discharge, and at 30 days, 6 months, 12 months, and 24 months  
144 post-surgery.

### 145 4. Funding and Potential Conflicts of Interest

ICF version No.: V1.0

version date: 2023-08-21

146 This trial is sponsored and funded by Shanghai HeartCare Medical Technology  
147 Co, Ltd. The researchers involved in this clinical trial do not own any equity  
148 (including shares) in Shanghai HeartCare Medical Technology Co., Ltd. or in  
149 companies that compete with its products. There are no conflicts of interest between  
150 Shanghai HeartCare Medical Technology Co., Ltd. and the researchers.

151 **5. Potential Benefits**

152 (1) Your intracranial atherosclerotic stenosis (ICAS) may be treated, potentially  
153 alleviating symptoms, improving your quality of life, and reducing the risk of disease  
154 recurrence.(2) Based on the randomization results, you will receive either the  
155 intracranial drug-eluting stent in the experimental group or the Wingspan Stent  
156 System (manufactured by Stryker (Beijing) Medical Devices Co., Ltd.) in the control  
157 group. Both stents will be provided free of charge by the sponsor.(3) You will receive  
158 professional medical care from doctors, along with close follow-up to guide your  
159 recovery.(4) By participating in this study, the medical data you provide may help  
160 other patients with similar conditions benefit in the future.

161 **6. Potential Risks and Discomforts**

162 Participation in this clinical trial and undergoing stent treatment carries potential  
163 risks similar to those associated with conventional stent implantation, including but  
164 not limited to:

|                                       |                                                 |                                                                                    |                                       |
|---------------------------------------|-------------------------------------------------|------------------------------------------------------------------------------------|---------------------------------------|
| Cerebrovascular perforator occlusion  | Hypersensitivity and allergic reactions         | Arrhythmias                                                                        | Aneurysm                              |
| In-stent restenosis                   | Hyperperfusion syndrome                         | Poor stent apposition                                                              | Hypotension/Hypertension              |
| Death                                 | Failure to deliver the stent to the lesion site | Arterial dissection                                                                | Hemorrhage                            |
| Stroke                                | Infection and pain at the puncture site         | Distal embolization                                                                | In-stent thrombosis                   |
| Fever                                 | Pseudoaneurysm from femoral artery puncture     | Adverse reactions to drugs, antiplatelet drugs, anticoagulants, or contrast agents | Thrombosis (acute, subacute, or late) |
| Thrombosis (acute, subacute, or late) | Hypercholesterolemia                            | Abnormal liver function tests                                                      | Arthralgia                            |
| Anemia                                | Diarrhea                                        | Infection                                                                          | Renal failure                         |



ICF version No.: V1.0

version date: 2023-08-21

|                    |                  |                                 |             |
|--------------------|------------------|---------------------------------|-------------|
| Leukopenia         | Thrombocytopenia | Hypercholesterolemia            | Hypokalemia |
| Vascular occlusion | Vasospasm        | Vascular perforation or rupture | /           |

165        Other unforeseen risks may also occur. If such situations arise, please promptly  
166        inform your research physician. They will provide proactive and comprehensive  
167        treatment to ensure your safety and rights.

168        Reproductive risks: Female participants who are breastfeeding or pregnant  
169        cannot participate in this trial. During the study period, if you become pregnant or  
170        suspect you are pregnant, it is crucial to inform the research physician immediately. If  
171        you plan to conceive within the next year, you should not participate in this trial.  
172        Participation may pose potential risks to sperm or eggs, potentially harming the child  
173        conceived during the study period. This harm has not been clinically confirmed and is  
174        unpredictable.

175        **7. Treatment and Compensation for Trial-Related Injuries**

176        If your health is compromised due to participation in this trial, please inform the  
177        research physician, who will take the necessary medical measures. According to  
178        Article 48 of the "Medical Device Clinical Trial Quality Management Regulations" of  
179        China, in the event of trial-related injuries, you are entitled to receive active treatment,  
180        and Shanghai HeartCare Medical Technology Co., Ltd will cover the medical  
181        expenses and provide economic compensation as stipulated by relevant laws.

182        Shanghai HeartCare Medical Technology Co., Ltd. has purchased insurance for  
183        this clinical trial. If you experience damage related to the trial, as judged by the  
184        researcher, they will provide active medical treatment. The insurance will offer  
185        appropriate compensation and indemnity. Any costs beyond the insurance coverage  
186        will be borne by the sponsor.

187        **8. The treatment groups**

188        Participants may be allocated to either the experimental group, receiving surgical  
189        treatment with the intracranial drug-eluting stent developed by Shanghai HeartCare

ICF version No.: V1.0

version date: 2023-08-21

Medical Technology Co., Ltd. or the control group, receiving surgical treatment with the Wingspan Stent System from Stryker (Beijing) Medical Technology Co., Ltd.

## 9. Alternative Treatment Methods Outside of This Trial

If you choose not to participate in this clinical trial, you will not have access to the investigational medical devices used in this study. However, you still have the option to undergo surgical treatment using medical devices approved by the National Medical Products Administration (NMPA) for commercial use. Please note that you will be responsible for the costs associated with these devices.

Stent implantation is a recent emerging technology over the past 2-3 years. Apart from surgical treatment, pharmacotherapy is also a common clinical approach. You may opt for pharmacological treatment based on your condition, but specific treatment options should be discussed with your attending physician.

## 10. Confidentiality of Medical Records

The principal investigator is responsible for safeguarding your health, dignity, autonomy, and privacy, ensuring confidentiality of your personal information.

Your participation in the trial and your personal data collected during the trial are strictly confidential. The Ethics Committee, National Medical Products Administration, or the sponsor may access participant information as required by regulations, with a duty to maintain confidentiality. When the trial results are published, your personal identity or privacy will not be disclosed.

## 11. Free Medical Services and Other Related Benefits During the Trial

(1) After participating in this study, you will receive either the intracranial drug-eluting stent as determined by randomization or the control group treatment with the Wingspan Stent System (produced by Stryker (Beijing) Medical Device Co., Ltd.) provided free of charge by the sponsor.(2) During your participation in the study, various laboratory tests and examinations will be conducted, including routine tests such as complete blood count, blood biochemistry, coagulation function, as well as

ICF version No.: V1.0

version date: 2023-08-21

218 head CTA, MRA, or DSA scans. These tests are part of standard care during surgical  
219 treatment, and even if you were not participating in the trial, they would generally be  
220 required for evaluation. The costs of these tests related to participation in the study  
221 will be covered by the sponsor (Results of the aforementioned tests conducted within  
222 the allowed preoperative period will not be repeated and will not be reimbursed if  
223 conducted before study participation). However, costs associated with treatments and  
224 tests required for other concurrent diseases are not covered.(3) If you are successfully  
225 enrolled in the study, follow-up imaging studies at 6 and 12 months post-surgery,  
226 including DSA or CTA scans, will be provided free of charge by the sponsor.  
227 Additionally, a subsidy of 1000 RMB for transportation and meals will be provided by  
228 the sponsor during each follow-up visit. This subsidy will be distributed uniformly  
229 upon completion of the 12-month follow-up based on the actual number of follow-up  
230 visits.

## 231 **12. Voluntary Participation and Withdrawal from the Trial**

232 You have the option to decline participation in this trial or withdraw at any time  
233 after informing the researcher without fear of discrimination or retaliation. Your  
234 medical treatment and rights will not be affected by your decision. If you require  
235 alternative diagnosis/treatment, fail to adhere to the trial protocol, or for any other  
236 valid reason, the researcher may terminate your continued participation in this trial.

237 You can learn about the progress related to the study at any time, and if you have  
238 any questions related to the study (e.g. rights and interests of the participant), or you  
239 have any discomfort or injury during the study, please contact (Investigator)  
240 \_\_\_\_\_at \_\_\_\_\_(Tel or mobile No.); and if you have any questions related to  
241 your rights and interests, contact the ethics committee of the Site at:  
242 \_\_\_\_\_.

243

ICF version No.: V1.0

version date: 2023-08-21

244 **Subject Informed Consent Statement**

245 I have carefully read this informed consent form, and I have had the opportunity  
246 to ask questions, all of which have been answered to my satisfaction. I understand that  
247 participation in this trial is voluntary, and I may choose not to participate or withdraw  
248 at any time after informing the researcher, without fear of discrimination or retaliation.  
249 My medical treatment and rights will not be affected by this decision.

250 If I require alternative diagnosis/treatment, fail to adhere to the trial protocol, or  
251 for any other valid reason, the researcher may terminate my continued participation in  
252 this clinical trial.

253 I voluntarily consent to participate in this clinical trial, and I will receive a signed  
254 copy of the "Informed Consent Form."

255 **Signature of the subject:** \_\_\_\_\_ **Date:** \_\_\_\_\_

256 **Tel:** \_\_\_\_\_

257 **Note: If the subject is unable to sign the informed consent form due to lack of capacity,**  
258 **their legal guardian or authorized representative should sign on their behalf.**

259 **Signature of guardian:** \_\_\_\_\_ **Date:** \_\_\_\_\_

260 **Relationship with subject:** \_\_\_\_\_ **Tel:** \_\_\_\_\_

261 **Reason why the subject cannot sign:** \_\_\_\_\_

262 **Note: If the subject lacks reading ability, a notary or authorized witness will read the**  
263 **informed consent form and other pertinent information to them, witness the consent process,**  
264 **and sign the informed consent form on their behalf.**

265 **Signature of an impartial witness:** \_\_\_\_\_ **Date:** \_\_\_\_\_

266 **Tel:** \_\_\_\_\_

267 **Statement of Investigator**

268 I confirm that I have accurately informed the subject of the contents of the  
269 Informed Consent Form and answered the questions raised by the subject, and the  
270 subject is willing to participate in this clinical trial.

271 **Signature of the Investigator:** \_\_\_\_\_ **Date:** \_\_\_\_\_

272 **Tel:** \_\_\_\_\_

273
